# Supplementary material
Source: PubMed Central journal article supplement (PMC7247417)
Supplement: NIHMS1586491-supplement-007775_-_Supplemental_Material.pdf [file NIHMS1586491-supplement-007775_-_Supplemental_Material.pdf]

## Supplemental Material

**Table S1. Candidate covariate list for multivariate modeling.**

**Demographics**

1. Age, years
2. Race – White/Non-White
3. Gender – Male/Female
4. Level of Education – Some School/High School Graduate/College Graduate/Post Graduate
5. Payor/Insurance – Medicare or Medicaid/private/Others

**Medical History**

1. Smoking – Current/Recent or Former/Non-smoker
2. Cancer – Yes/No
3. Hypertension – Yes/No
4. Osteoporosis – Yes/No
5. Diabetes – Yes/No
6. Hip Fracture – Yes/No
7. Hyperthyroidism – Yes/No
8. Hypothyroidism – Yes/No
9. GI Bleed – Yes/No
10. Obstructive Sleep Apnea – Yes/No
11. Dialysis – Yes/No
12. Hyperlipidemia – Yes/No
13. Anemia – Yes/No
14. Cognitive Impairment/Dementia – Yes/No
15. Frailty – Yes/No
16. Liver Disease – Yes/No
17. COPD – Yes/No
18. Alcohol abuse – Yes/No
19. Drug use – Yes/No

**Cardiovascular History**

1. Family History of AF – Yes/No
2. Peripheral Arterial Disease – Yes/No
3. Sinus Node Dysfunction/Sick Sinus Syndrome – Yes/No
4. Stroke or TIA – Yes/No
5. Congestive Heart Failure (CHF) – No CHF/NYHA Class I/NYHA Class II/NYHA Class III or NYHA Class IV
6. Significant Valvular Disease – Yes/No
7. Prior Valve Replacement/Repair – Yes/No

**Coronary Artery Disease History**

1. History of Coronary Artery Disease – Yes/No
2. Prior MI – Yes/No
3. Prior CABG – Yes/No
4. Any PCI – Yes/No

**Vital Signs & AF status**

1. Heart Rate, bpm

2. Diastolic Blood Pressure, mmHG
3. Systolic Blood Pressure, mmHG
4. Body Mass Index, kg/m<sup>2</sup>
5. Intraventricular Conduction – RBBB/LBBB/Non-specific IVCD or Unknown-Ventricularly Paced/none

### **Echocardiographic Assessment (TTE or TEE)**

1. LVEF – Normal ( $\geq 50\%$ )/Mild dysfunction ( $>40\%$ ,  $<50\%$ )/Moderate dysfunction ( $\geq 30\%$ ,  $\leq 40\%$ )/Severe dysfunction ( $<30\%$ )
2. LAD Type – Normal/Mild enlargement/Moderate enlargement/Severe enlargement

### **Laboratory Data**

1. eGFR (MDRD), mg/dl
2. Hematocrit, %

### **Atrial Fibrillation Diagnosis**

1. Type of AF – First Detected or New Onset/Paroxysmal AF/Persistent AF /Permanent AF
2. EHRA Score – No symptoms/Mild/Severe/Disabling
3. Baseline AFEQT score
4. AF management strategy – Rate Control/Rhythm Control
5. Prior Cardioversions – Yes/No
6. Prior antiarrhythmic drug – Yes/No
7. Catheter Ablation of AF – Yes/No
8. AV Node or HIS Bundle Ablation – Yes/No

### **Functional Status**

1. Functional Status – Living independently/Living with assistance or Resides in assisted living facility or Resides in skilled nursing home or Bedbound

### **Provider or Site**

1. PI/Site Specialty – Cardiology/Electrophysiology/Family Practice or Internal Medicine

**Table S2. Events occurring during one-year follow-up by hrQoL improvement status**

|                                            | <b>Overall<br/>N=636</b> | <b>No large<br/>improvement<br/>in hrQoL<br/>N=455</b> | <b>Large<br/>improvement<br/>in hrQoL<br/>N=181</b> | <b>P-Value</b> |
|--------------------------------------------|--------------------------|--------------------------------------------------------|-----------------------------------------------------|----------------|
| AF Interventions                           | 32 (5.0%)                | 15 (3.3%)                                              | 17 (9.4%)                                           | 0.0015         |
| Catheter ablation                          | 21 (3.3%)                | 9 (2.0%)                                               | 12 (6.6%)                                           | 0.0031         |
| Atrial flutter ablation                    | 3 (0.5%)                 | 2 (0.4%)                                               | 1 (0.6%)                                            | 0.8513         |
| AV Node/HIS Bundle ablation                | 6 (0.9%)                 | 4 (0.9%)                                               | 2 (1.1%)                                            | 0.7905         |
| Surgical/MAZE/Hybrid MAZE                  | 2 (0.3%)                 | 0 (0.0%)                                               | 2 (1.1%)                                            | 0.0248         |
| Any cardioversion                          | 49 (7.7%)                | 27 (5.9%)                                              | 22 (12.2%)                                          | 0.0080         |
| Pharmacologic                              | 5 (0.8%)                 | 5 (1.1%)                                               | 0 (0.0%)                                            | 0.1571         |
| DC Cardioversion                           | 44 (6.9%)                | 22 (4.8%)                                              | 22 (12.2%)                                          | 0.0010         |
| New cardiac device implantation            | 28 (4.4%)                | 20 (4.4%)                                              | 8 (4.4%)                                            | 0.9893         |
| Pacemaker                                  | 14 (2.2%)                | 11 (2.4%)                                              | 3 (1.7%)                                            | 0.5558         |
| ICD                                        | 8 (1.3%)                 | 5 (1.1%)                                               | 3 (1.7%)                                            | 0.5688         |
| CRT-P                                      | 3 (0.5%)                 | 2 (0.4%)                                               | 1 (0.6%)                                            | 0.8513         |
| CRT-D                                      | 4 (0.6%)                 | 3 (0.7%)                                               | 1 (0.6%)                                            | 0.8779         |
| Adverse Clinical Events                    |                          |                                                        |                                                     |                |
| Major bleeding                             | 27 (4.2%)                | 22 (4.8%)                                              | 5 (2.8%)                                            | 0.2424         |
| TIA/Stroke or non-CNS<br>systemic embolism | 6 (0.9%)                 | 6 (1.3%)                                               | 0 (0.0%)                                            | 0.1209         |
| New-onset heart failure                    | 7 (1.6%)                 | 5 (1.6%)                                               | 2 (1.5%)                                            | 0.9069         |
| All-cause hospitalization                  | 241 (37.9%)              | 164 (36.0%)                                            | 77 (42.5%)                                          | 0.1278         |

Values are presented as n (%).

hrQoL: health-related quality of life; TIA: transient ischemic attack.

**Figure S1. Adjusted odds ratio of large hrQoL improvement (log scale), according to baseline AFEQT.**

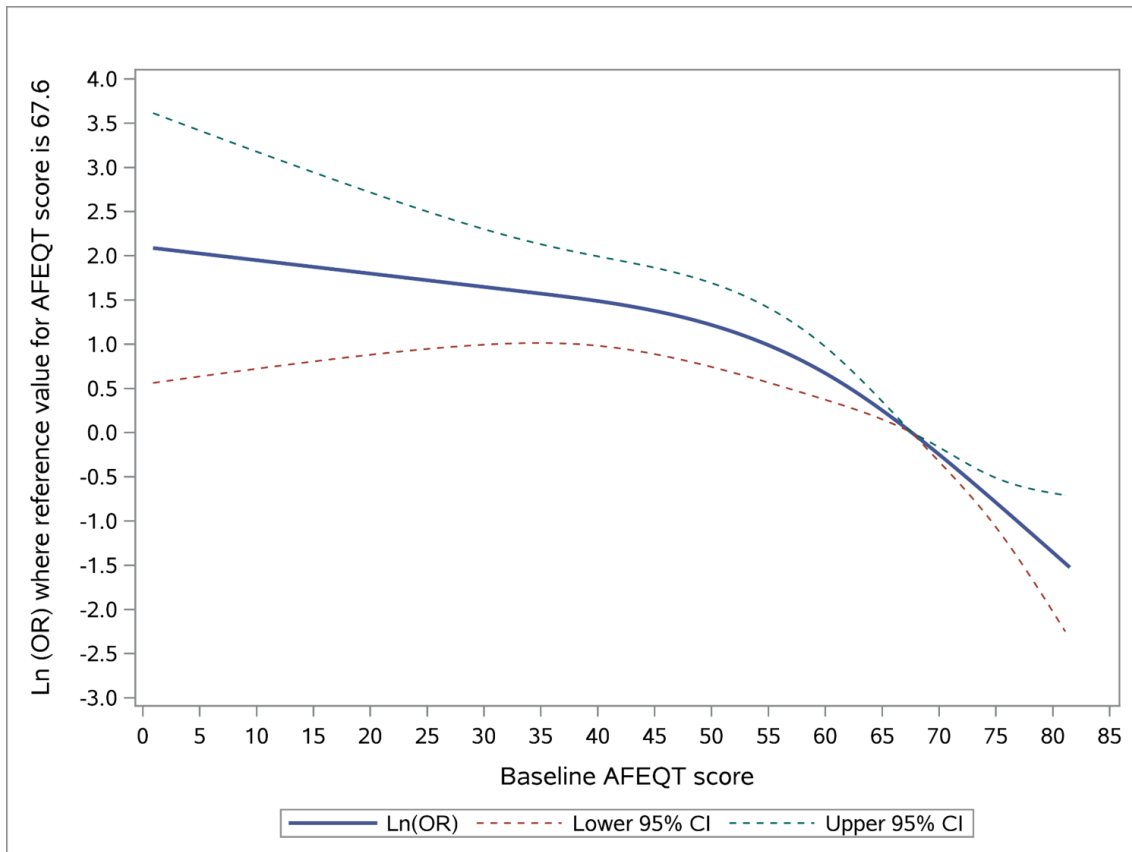

**Table S3. Subsequent events by hrQoL improvement status.**

| <b>Outcome</b>                 | <b>No large improvement in hrQoL<br/>N=432</b> | <b>Large improvement in hrQoL<br/>N=172</b> | <b>P-value</b> |
|--------------------------------|------------------------------------------------|---------------------------------------------|----------------|
| Major bleeding                 | 20 (3.05)                                      | 7 (2.63)                                    | 0.7366         |
| Stroke/non-CNS embolism or TIA | 14 (2.11)                                      | 3 (1.11)                                    | 0.3143         |
| New-onset HF diagnosis         | 6 (1.32)                                       | 2 (1.00)                                    | 0.7295         |
| All-cause hospitalization      | 182 (35.90)                                    | 70 (32.86)                                  | 0.5303         |

The incidence rate represents the number of events per 100 subject years. Patients with negative follow-up time or without any follow-up after 1 year were excluded (N=32). For new-onset HF, patients with CHF at baseline were excluded (N=189).

hrQoL: health-related quality of life.

**Table S4. Factors associated with significant hrQoL improvement, including patients that died without significant hrQoL improvement (n=741)**

|                                                         | <b>OR (95% CI)</b> | <b>P-value</b> |
|---------------------------------------------------------|--------------------|----------------|
| Baseline AFEQT score (per 5 point increase & > 50)      | 0.69 (0.63-0.76)   | <.0001         |
| Living with assistance vs. no assistance                | 0.28 (0.13-0.63)   | 0.0021         |
| Prior stroke/TIA                                        | 0.44 (0.26-0.74)   | 0.0022         |
| Diastolic blood pressure (per 10 point increase & > 65) | 1.32 (1.09-1.61)   | 0.0042         |
| Peripheral arterial disease                             | 0.51 (0.30-0.90)   | 0.0188         |

hrQoL: health-related quality of life; AFEQT: Atrial Fibrillation Effect on QualiTy-of-Life

**Table S5. Factors associated with large hrQoL improvement status among patients diagnosed with AF more 1 year prior to baseline (n=448)\***

| <b>Variable</b>                                    | <b>OR (95% CI)</b> | <b>P-value</b> |
|----------------------------------------------------|--------------------|----------------|
| Baseline AFEQT score (per 5 point increase & > 50) | 0.72 (0.64-0.81)   | <.0001         |
| Anemia                                             | 2.11 (1.25-3.55)   | 0.0051         |
| Prior stroke/TIA                                   | 0.45 (0.24-0.84)   | 0.0132         |
| Peripheral arterial disease                        | 0.45 (0.24-0.87)   | 0.0173         |
